# Supplementary material for: Synthesis of boron imidazolate frameworks with cobalt clusters for efficient visible-light driven CO2 reduction
Source: Royal Society of Chemistry journal article supplement (doi:10.1039/c9ta04842a), 2019-01-01
Supplement: c9ta04842a1.pdf [file c9ta04842a1.pdf]

## Supplementary Information

### Synthesis of Boron Imidazolate Framework with Cobalt Clusters for the Efficient Visible-Light Driven CO<sub>2</sub> Reduction

Qin-Long Hong, Hai-Xia Zhang\* and Jian Zhang\*

*State Key Laboratory of Structural Chemistry, Fujian Institute of Research on the Structure of Matter, Chinese Academy of Sciences, Fuzhou, Fujian 350002, P. R. China*

#### Experiment section

**Materials and methods.** All chemical reagents for syntheses were used as purchased without further purification. All the solvents used were of analytical grade. Field Emission Transmission Electron Microscope (FETEM) images were recorded by FEI Tecnai F20. Powder X-ray diffraction (PXRD) analyses were recorded on a Rigaku Dmax2500 diffractometer (MiniFlex-II) with Cu K $\alpha$  radiation ( $\lambda = 1.54056 \text{ \AA}$ ). A UV-visible spectrophotometer (Lambda 950, PerkinElmer) was used to measure the absorption spectra of the as-prepared samples. Surface chemical analyses were performed by X-ray photoelectron spectroscopy (XPS, Thermo Fisher, ESCALAB 250Xi). Steady-state PL were recorded on a Multi-Mode Microplate Readers (BioTek, Synergy neo2). Time-resolved PL spectra were investigated by a fluorescent spectrophotometer (Edinburgh, FLS980).

**Synthesis of BIF-101 crystals.** KBH(2-mim)<sub>3</sub> (0.035 g), nitroterephthalic acid (0.015g) and Co(NO<sub>3</sub>)<sub>2</sub> (0.050 g) were mixed in H<sub>2</sub>O (1 mL)/2-propanol (1 mL)/DMA (2 mL) solution in a 20 mL vial and stirred for half an hour. The mixture was heated at 80 °C for 5 days, followed by cooling to room temperature. The orange red block crystals were obtained. Yield, 58% (based on B).

**Photocatalytic CO<sub>2</sub> reduction experiments.** The photocatalytic reduction of CO<sub>2</sub> was carried out in a 400 mL reactor and irradiated under a 300-W (PLS-SXE300D)Xe lamp with a 420 nm cutoff filter. Prior to light illumination, the whole reaction setup was vacuumed and then the high-purity CO<sub>2</sub> gas was bubbled into the reaction setup to reach a pressure of 1 atm. In a typical reaction system, the catalyst BIF-101 (10 mg, 24.6  $\mu\text{mol}$  based on cobalt) was suspended in acetonitrile/H<sub>2</sub>O (v/v = 4:1) containing 5% (v/v) TEOA (90 mL, pH = 9.3 adjusted with HNO<sub>3</sub>) and [Ru(bpy)<sub>3</sub>]Cl<sub>2</sub>·6H<sub>2</sub>O (75 mg), by stirring with a magnetic stirrer. The generated gas products were analyzed by a gas chromatography analyzer (FULI 9790II) equipped with the flame ionization detector (FID) and thermal conductivity detector (TCD). Each reaction was repeated three times to ensure the reliability of the experiment data. The turnover number (TON) is defined as the number of produced product that occur per catalyst.

**PL Characterization.** Steady-state photoluminescence (PL) spectra were recorded on a Multi-Mode Microplate Readers (BioTek, Synergy neo2). Time-resolved PL decay spectra were recorded on a FLS980 Spectrometer. The photoluminescent quenching of [Ru(bpy)<sub>3</sub>]Cl<sub>2</sub> (66  $\mu\text{M}$ , 10 mL) were performed in the reaction system solution (CH<sub>3</sub>CN/H<sub>2</sub>O = 4:1, with TEOA 5%) upon the addition of increasing amounts of BIF-101 (0.00, 0.25, 0.50, 0.75, and 1.00 mg) or TEOA (0.0, 0.25, 0.5, 1.0, and 1.5 mL). The samples were excited at  $\lambda_{\text{ex}} = 375 \text{ nm}$ . The solution of

[Ru(bpy)<sub>3</sub>]Cl<sub>2</sub> (66 μM, 10 mL) and after addition of BIF-101 (1.00 mg) were used for time-resolved PL decay testing, respectively, excited at λ<sub>ex</sub> = 375 nm.

**Electrochemical measurements.** The measurements were studied on an electrochemical analyzer (CHI 760E) in a standard three-electrode cell, with working electrode (indium tin oxide, ITO), reference electrode Ag/AgCl (KCl saturated) and counter electrode platinum plate. Mott-Schottky measurements were conducted at frequencies of 500, 1500 Hz in the potential range from -1 to 1 V. Photocurrent tests were performed at the potential 0.3 V (vs Ag/AgCl) excited by a 300-W Xe lamp with a 420 nm cutoff filter. **Preparation of working electrodes:** (1) BIF-101 powder (5 mg) were dispersed in the solution containing ethanol (0.5 mL), acetonitrile (0.5 mL) and nafion (10 μL) then ultrasonication for 30 min. 20 μL of the prepared suspension was pipetted onto the ITO (0.25 cm<sup>2</sup>) and dried at ambient temperature. (2) For the addition of [Ru(bpy)<sub>3</sub>]Cl<sub>2</sub>, the prepared working electrode BIF-101 (1) was immersed in [Ru(bpy)<sub>3</sub>]Cl<sub>2</sub> solution (1 mg/mL, 16 mL, CH<sub>3</sub>CN/H<sub>2</sub>O = 4:1) for 1 hour, and then the photocurrent was measured.

**Quantum efficiency (QE) measurements.** The quantum efficiencies of CO generation were measured under the same photocatalytic reaction condition irradiated by the Xe lamp equipped with a band-pass filter centered at 450 nm. QE values were calculated according to the following equation:

$$QE = \frac{2 \times \text{CO}}{\text{incident photons}} \times 100\%$$

The flux of incident photons was measured by a photoradiometer (PL-MW2000, PerfectLight).

The light intensity (I) was measured to be 33 mW/cm<sup>2</sup> at 450 nm and the illuminated area (S) was 41.83 cm<sup>2</sup>. The incident photons flux were calculated using the equation:

$$\text{Photon flux} = \frac{I \times S}{(h \times c / \lambda) \times N_A} = 5.19 \times 10^{-6} \text{ mol / s}$$

h is Plank constant = 6.62606957 × 10<sup>-34</sup> J·S, c is velocity of light = 2.99792458 × 10<sup>8</sup> m/S, N<sub>A</sub> is the Avogadro constant = 6.02214076 × 10<sup>23</sup>. After 5 h, the yield of CO was 61.5 μmol. Based on equations, QE was calculated as 0.132%.

**Table S1. Summary of crystal data and structural refinements for BIF-101**

|                                             |                                                                                                                  |
|---------------------------------------------|------------------------------------------------------------------------------------------------------------------|
| Compound reference                          | BIF-101                                                                                                          |
| Chemical formula                            | $\text{Co}_{1.5}(\text{OiPr})_{0.5}(\text{OH})_{0.5}(\text{H}_2\text{O})(\text{HBH}(\text{mim})_3)(\text{NBDC})$ |
| Formula mass                                | 1219.27                                                                                                          |
| Crystal system                              | monoclinic                                                                                                       |
| a [Å]                                       | 26.697(8)                                                                                                        |
| b [Å]                                       | 11.981(3)                                                                                                        |
| c [Å]                                       | 22.084(4)                                                                                                        |
| $\alpha$ [°]                                | 90.00                                                                                                            |
| $\beta$ [°]                                 | 92.738                                                                                                           |
| $\gamma$ [°]                                | 90.00                                                                                                            |
| Unit cell volume [Å <sup>3</sup> ]          | 7056(3)                                                                                                          |
| Temperature [K]                             | 293(2)                                                                                                           |
| Space group                                 | <i>C2/c</i>                                                                                                      |
| No. of formula units per unit cell, Z       | 4                                                                                                                |
| No. of reflections measured                 | 29596                                                                                                            |
| No. of independent reflections              | 8074                                                                                                             |
| $R_{\text{int}}$                            | 0.1186                                                                                                           |
| Final R1 values ( $I > 2\sigma(I)$ )        | 0.1230                                                                                                           |
| Final $wR(F^2)$ values ( $I > 2\sigma(I)$ ) | 0.3714                                                                                                           |
| Goodness of fit on $F^2$                    | 1.114                                                                                                            |

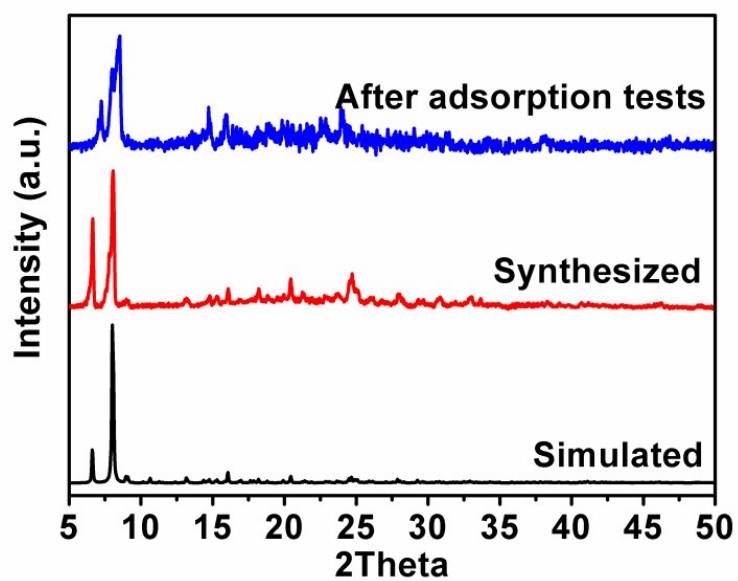

**Figure S1.** The Powder XRD patterns of **BIF-101** (simulated, synthesized and after adsorption tests).

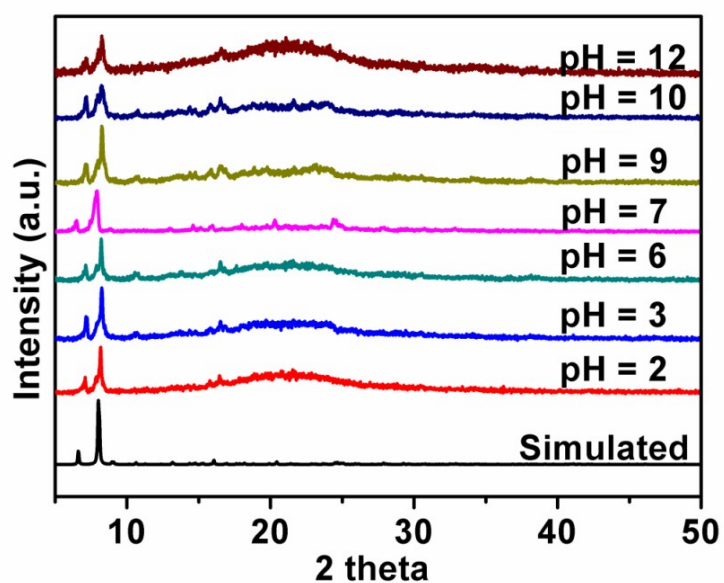

**Figure S2.** The Powder XRD patterns of **BIF-101** (simulated, immersed in pH = 2, 3, 6, 7, 9, 10, 12 aqueous solution for 10 h with  $\text{HNO}_3$  or  $\text{NaOH}$  adjusted)

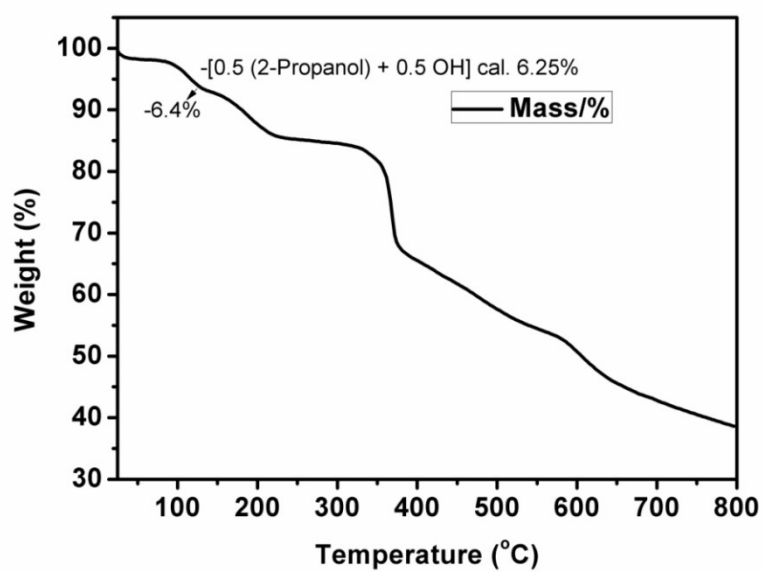

**Figure S3.** The TGA plot of BIF-101.

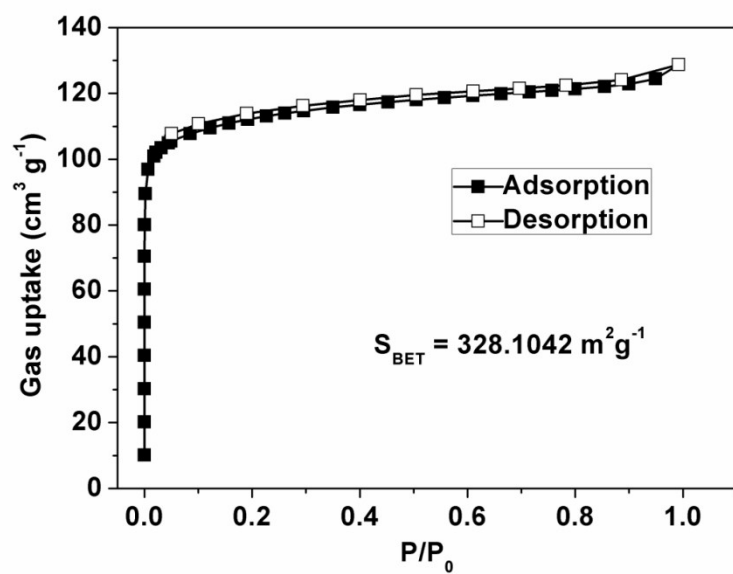

**Figure S4.** The N<sub>2</sub> isotherms of BIF-101 at 77 K.

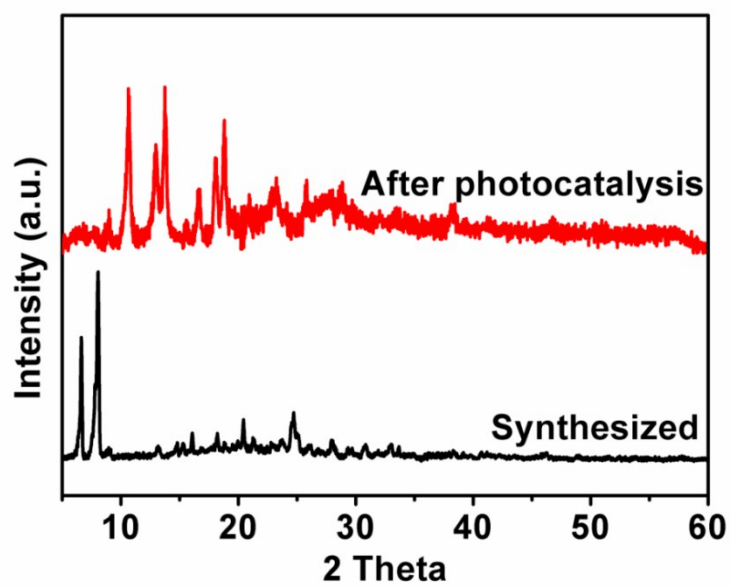

**Figure S5.** The Powder XRD patterns of BIF-101 after photocatalysis for  $\text{CO}_2$ , which reveals that the structure has changed.

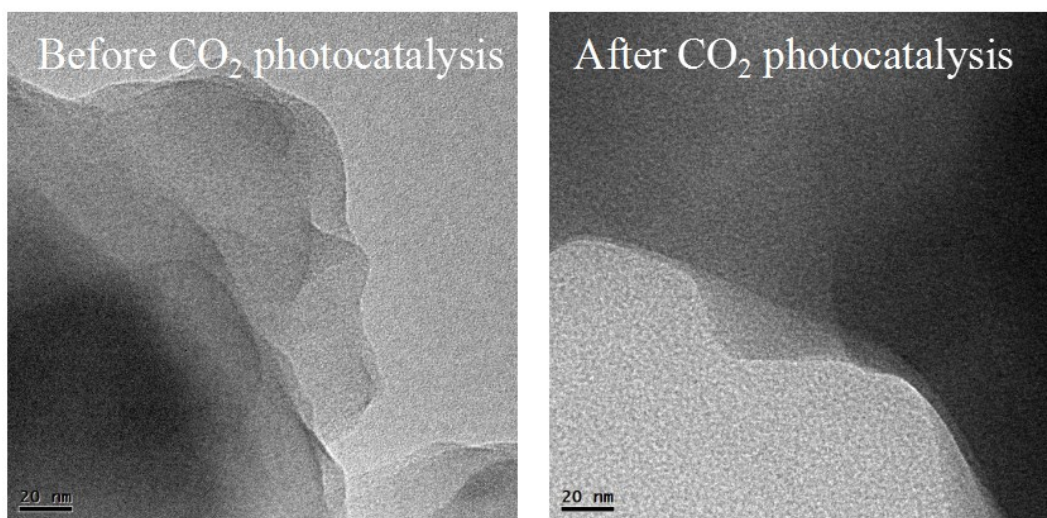

**Figure S6.** HR-TEM images of BIF-101 before and after  $\text{CO}_2$  photoreduction, it turns out that no metal nanoparticles are formed.

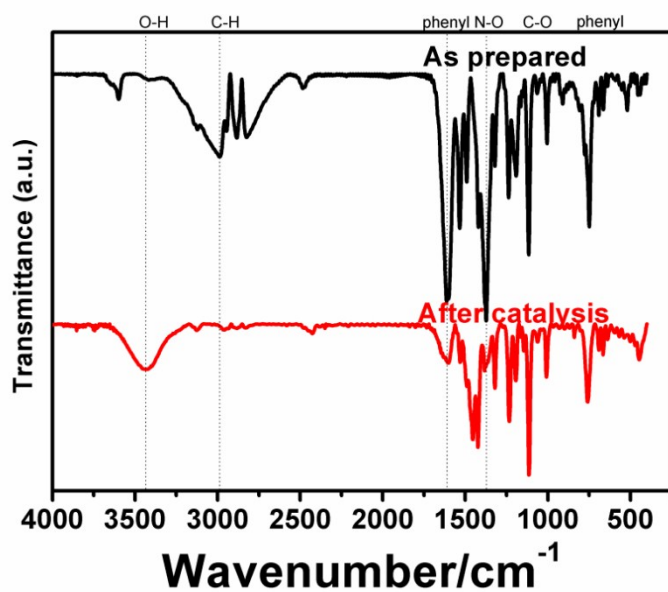

**Figure S7.** FT-IR analysis to relate BIF-101 atomic bonding before and after photocatalysis for  $\text{CO}_2$ , the spectra reveal that NBDC are released from the framework.

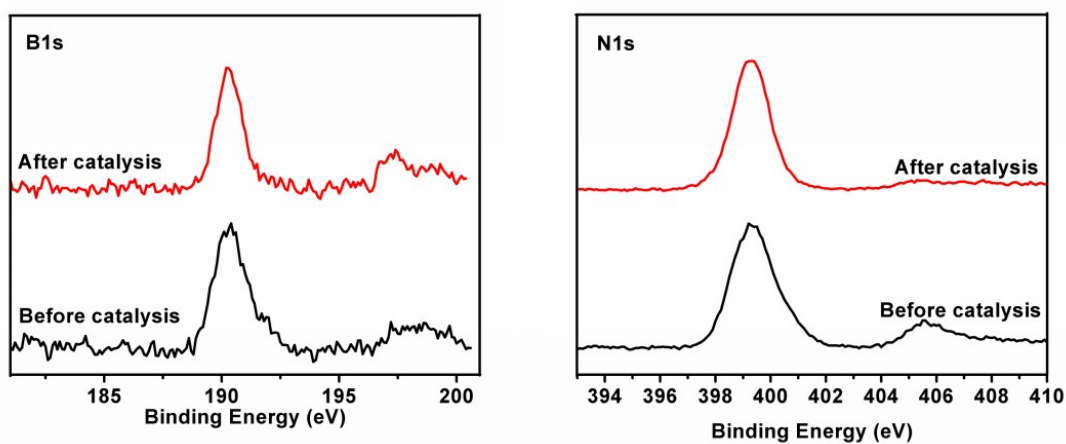

**Figure S8.** The XPS spectra of B1s and N1s in BIF-101 before and after  $\text{CO}_2$  photoreduction.

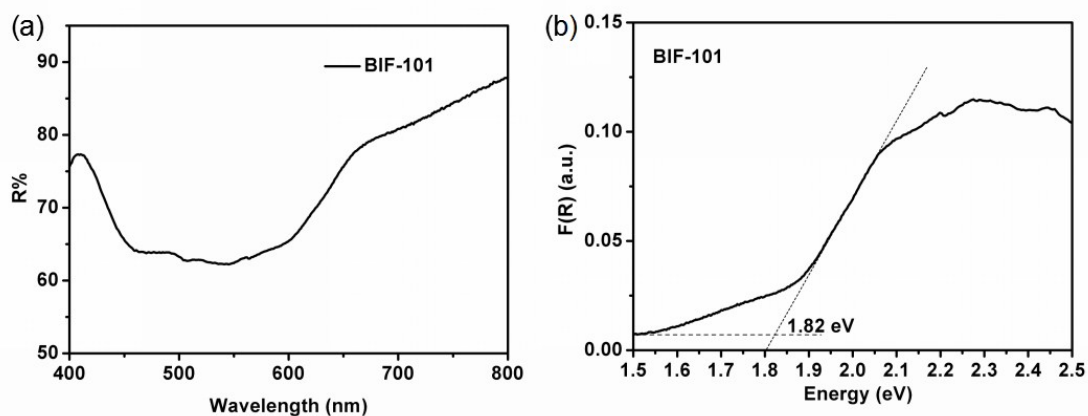

**Figure S9.** a) The UV-Vis diffusion spectrum of BIF-101. b) Tauc plots of BIF-101 for band gap calculation based on UV-Vis spectrum.

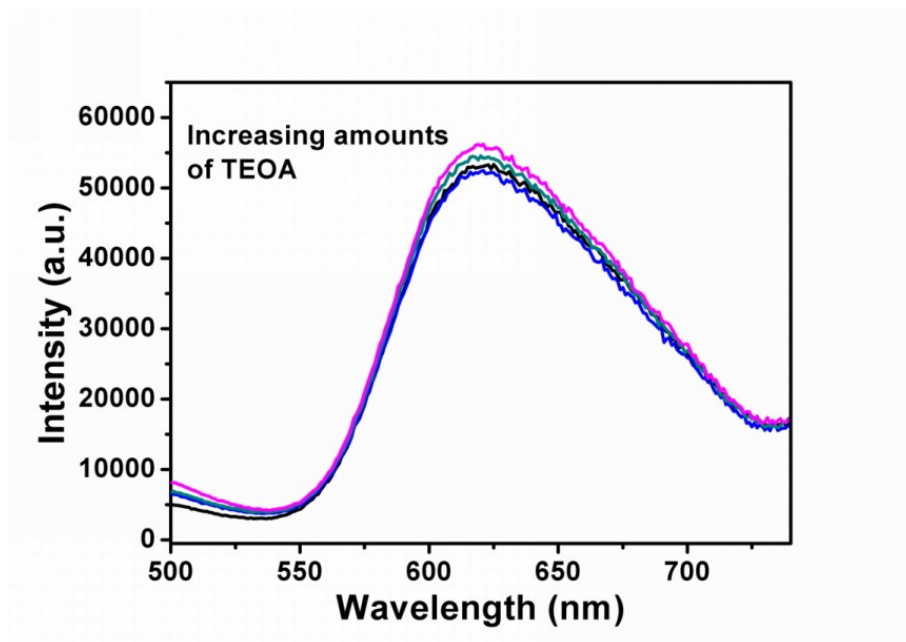

**Figure S10.** Steady state fluorescence spectra of  $[\text{Ru}(\text{bpy})_3]\text{Cl}_2$  ( $66\ \mu\text{M}$ ) upon the addition of TEOA ( $\lambda_{\text{ex}} = 375\ \text{nm}$ ).

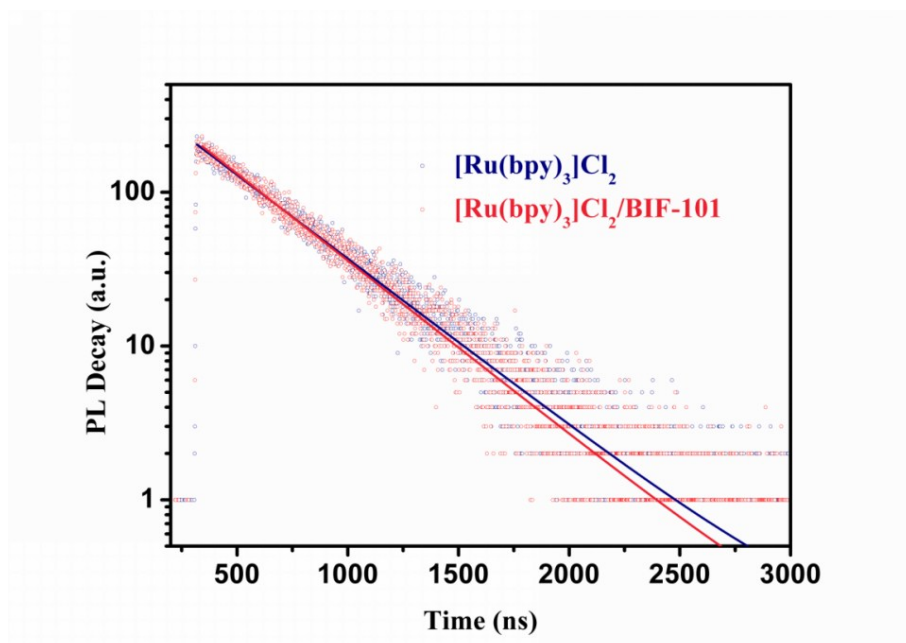

**Figure S11.** Time-resolved fluorescence decay spectra of  $[\text{Ru}(\text{bpy})_3]\text{Cl}_2$  with and without BIF-101.



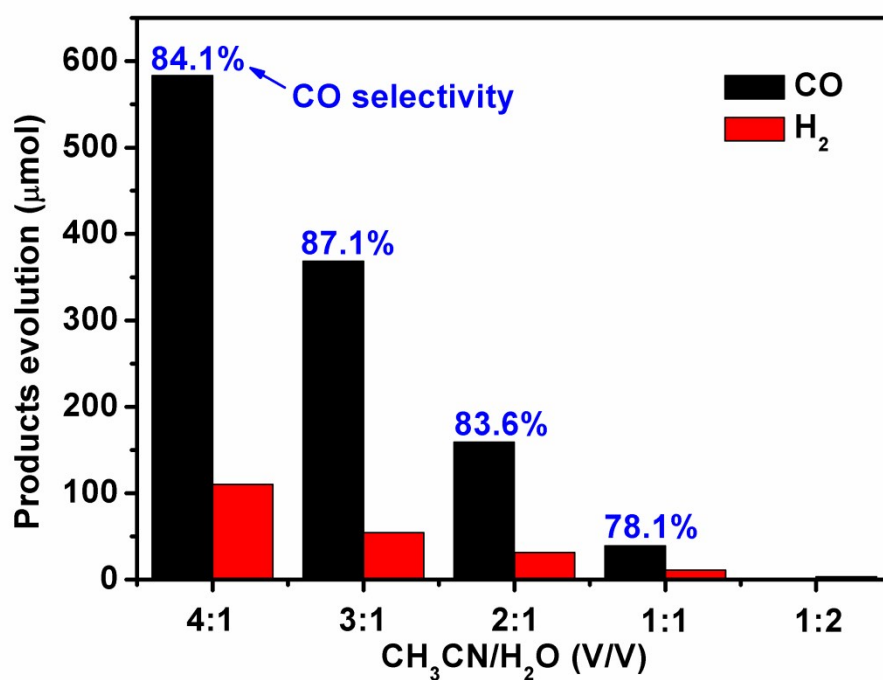

**Figure S12.** The effect of volume ratio of CH<sub>3</sub>CN/H<sub>2</sub>O on CO<sub>2</sub> photoreduction. (10 mg BIF-101, 90 mL CH<sub>3</sub>CN/H<sub>2</sub>O solution with 5% TEOA, 75 mg [Ru(bpy)<sub>3</sub>]Cl<sub>2</sub>, 300 W Xe lamp with a 420 nm cutoff filter).

**Table S2.** Performance comparison of our sample with state-of-the-art catalysts for CO<sub>2</sub> photoreduction.

| Catalyst<br>(used amount) | Photosensitizer                        | Electron<br>donor | Solvent                    | Light source<br>(nm)        | Major Product<br>rate <sup>a</sup><br>(μmol g <sup>-1</sup> h <sup>-1</sup> ) | Ref.                                                        |
|---------------------------|----------------------------------------|-------------------|----------------------------|-----------------------------|-------------------------------------------------------------------------------|-------------------------------------------------------------|
| ZrPP-1-Co                 | /                                      | TEOA              | MeCN                       | λ>420<br>(300 W Xe<br>lamp) | CO 14.5                                                                       | <i>Adv. Mater.</i><br><b>2018</b> , 30,<br>1704388.         |
| MAF-X271-OH<br>(30 nmol)  | [Ru(bpy) <sub>3</sub> ]Cl <sub>2</sub> | TEOA              | MeCN /<br>H <sub>2</sub> O | λ=420<br>(LED light)        | CO 6.37<br>(μmol h <sup>-1</sup> )                                            | <i>J. Am. Chem.<br/>Soc.</i> <b>2018</b> , 140,<br>38.      |
| Co-ZIF-9<br>(0.8 μmol)    | [Ru(bpy) <sub>3</sub> ]Cl <sub>2</sub> | TEOA              | MeCN /<br>H <sub>2</sub> O | λ>420<br>(Xe lamp)          | CO 83.6<br>(μmol h <sup>-1</sup> )                                            | <i>Angew. Chem.<br/>Int. Ed.</i> <b>2014</b> ,<br>53, 1034. |

|                                             |                                        |      |                         |                              |                                    |                                                              |
|---------------------------------------------|----------------------------------------|------|-------------------------|------------------------------|------------------------------------|--------------------------------------------------------------|
| Ni(TPA/TEG) (L)                             | [Ru(bpy) <sub>3</sub> ]Cl <sub>2</sub> | TEOA | MeCN / H <sub>2</sub> O | λ>420<br>(300 W Xe lamp)     | CO 15866                           | <i>Sci. Adv.</i> <b>2017</b> , 3: e1700921.                  |
| Co <sub>3</sub> O <sub>4</sub> platelets    | [Ru(bpy) <sub>3</sub> ]Cl <sub>2</sub> | TEOA | MeCN / H <sub>2</sub> O | λ>420<br>(300 W Xe lamp)     | CO 3523                            | <i>Adv. Mater.</i> <b>2016</b> , 28, 6485.                   |
| [Ni(bpet)] <sup>2+</sup>                    | [Ru(bpy) <sub>3</sub> ] <sup>2+</sup>  | BIH  | DMA / H <sub>2</sub> O  | λ=450<br>(6 W LED lamp)      | CO 84.5                            | <i>J. Am. Chem. Soc.</i> <b>2017</b> , 139, 6538.            |
| MOF-525-Co                                  | /                                      | TEOA | MeCN                    | 400<λ<800<br>(300 W Xe lamp) | CO 201.6<br>CH <sub>4</sub> 36.67  | <i>Angew. Chem. Int. Ed.</i> <b>2016</b> , 128, 14522-14526. |
| NH <sub>2</sub> -UiO-66                     | /                                      | TEOA | MeCN                    | 420<λ<800<br>(500 W Xe lamp) | HCOO <sup>-</sup> 26.4             | <i>Chem.-Eur. J.</i> <b>2013</b> , 19, 14279.                |
| UiO-66/CNNS                                 | /                                      | TEOA | MeCN                    | 400<λ<800<br>(300 W Xe lamp) | CO 9.9                             | <i>Adv. Funct. Mater.</i> <b>2015</b> , 25, 5360.            |
| NH <sub>2</sub> -MIL-101(Fe)                | /                                      | TEOA | MeCN                    | 400<λ<800<br>(300 W Xe lamp) | HCOO <sup>-</sup> 445              | <i>ACS Catal.</i> <b>2014</b> , 4, 4254.                     |
| NH <sub>2</sub> -MIL-125(Ti)                | /                                      | TEOA | MeCN                    | 400<λ<800<br>(500 W Xe lamp) | HCOO <sup>-</sup> 16.3             | <i>Angew. Chem. Int. Ed.</i> <b>2012</b> , 51, 3364.         |
| PCN-222                                     | /                                      | TEOA | MeCN                    | 400<λ<800<br>(300 W Xe lamp) | HCOO <sup>-</sup> 60               | <i>J. Am. Chem. Soc.</i> <b>2015</b> , 137, 13440.           |
| MOF-253-Ru(CO) <sub>2</sub> Cl <sub>2</sub> | /                                      | TEOA | MeCN                    | 400<λ<800<br>(Xe lamp)       | HCOO <sup>-</sup> 16.75<br>CO 46.5 | <i>Chem. Commun.</i> <b>2015</b> , 51, 2645.                 |

|                                                     |                                        |      |      |                                           |                                 |                                               |
|-----------------------------------------------------|----------------------------------------|------|------|-------------------------------------------|---------------------------------|-----------------------------------------------|
| (Y[Ir(ppy) <sub>2</sub> (dcbpy)] <sub>2</sub> [OH]) | /                                      | TEOA | MeCN | Visible light<br>(500 W Xe<br>lamp)       | HCOO <sup>-</sup> 158.3         | <i>Chem. Sci.</i><br><b>2014</b> , 5, 3808.   |
| Eu-Ru(phen) <sub>3</sub> -MOF                       | /                                      | TEOA | MeCN | 420< $\lambda$ <800<br>(300 W Xe<br>lamp) | HCOO <sup>-</sup> 94.0          | <i>Nat. Commun.</i><br><b>2018</b> , 9, 3353. |
| BIF-20@g-C <sub>3</sub> N <sub>4</sub> (20%)        | /                                      | TEOA | MeCN | 400< $\lambda$ <800<br>(300 W Xe<br>lamp) | CO 53.9<br>CH <sub>4</sub> 15.5 | <i>ACS Nano</i><br><b>2018</b> , 12, 5333.    |
| BIF-101                                             | [Ru(bpy) <sub>3</sub> ]Cl <sub>2</sub> | TEOA | MeCN | $\lambda$ >420<br>(300 W Xe<br>lamp)      | CO 5830                         | <i>This work</i>                              |
